# Supplementary material for: Genetic and antigenic evolution of H1 swine influenza A viruses isolated in Belgium and the Netherlands from 2014 through 2019
Source: PubMed Central journal article supplement (PMC8163766; doi:10.1038/s41598-021-90512-z), 2021-05-28
Supplement: 41598_2021_90512_MOESM1_ESM.pdf [file 41598_2021_90512_MOESM1_ESM.pdf]

## Genetic and antigenic evolution of H1 swine influenza A viruses isolated in Belgium and the Netherlands from 2014 through 2019

Sharon Chepkwony, Anna Parys, Elien Vandoorn, Wojciech Stadejek, Jiexiong Xie, Jacqueline King, Annika Graaf, Anne Pohlmann, Martin Beer, Timm Harder and Kristien Van Reeth

**Supplementary Table S1.** Range of percentage amino acid (aa) identities in the HA1 and antigenic sites of the isolates and reference viruses

| A<br>Virus Isolates<br>clade | EU H1av reference viruses                                   |                    |                                         |                    |                                  |                    |
|------------------------------|-------------------------------------------------------------|--------------------|-----------------------------------------|--------------------|----------------------------------|--------------------|
|                              | swFI82<br>(Clade 1C.1)                                      |                    | swBE98<br>(Clade 1C.2)                  |                    | swG05, swG10<br>(Clade 1C.2.1)   |                    |
|                              | HA1                                                         | Antigenic<br>sites | HA1                                     | Antigenic<br>sites | HA1                              | Antigenic<br>sites |
| 1C.2.1                       | 85.3 – 88.7                                                 | 70.0 – 82.0        | 91.1 – 94.6                             | 78.0 – 90.0        | 92.0 – 96.8                      | 82.0 – 96.0        |
| 1C.2.2                       | 84.1 – 87.2                                                 | 76.0 – 82.0        | 88.7 – 91.7                             | 84.0 – 90.0        | 91.1 – 95.1                      | 88.0 – 96.0        |
| 1B.1.2.1                     | 71.9 – 73.7                                                 | 34.0 – 40.0        | 69.4 – 70.9                             | 40.0 – 44.0        | 68.5 – 70.6                      | 36.0 – 42.0        |
| 1A.3.3.2                     | 74.0 – 77.7                                                 | 52.0 – 66.0        | 70.9 – 74.0                             | 58.0 – 68.0        | 69.7 – 73.4                      | 54.0 – 64.0        |
| B<br>Virus isolates<br>clade | EU H1hu and related human seasonal reference viruses        |                    |                                         |                    |                                  |                    |
|                              | swSC94<br>(Clade 1B.1)                                      |                    | swG99, swG02, swG12<br>(Clade 1B.1.2.1) |                    | TW86<br>(Clade 1B.1-like)        |                    |
|                              | HA1                                                         | Antigenic<br>sites | HA1                                     | Antigenic<br>sites | HA1                              | Antigenic<br>sites |
| 1C.2.1                       | 69.7 – 72.4                                                 | 40.0 – 48.0        | 68.2 – 71.2                             | 34.0 – 44.0        | 70.6 – 73.6                      | 40.0 – 48.0        |
| 1C.2.2                       | 69.1 – 70.9                                                 | 42.0 – 44.0        | 67.3 – 70.0                             | 36.0 – 40.0        | 70.6 – 72.5                      | 40.0 – 44.0        |
| 1B.1.2.1                     | 89.2 – 91.1                                                 | 72.0 – 86.0        | 87.5 – 96.0                             | 74.0 – 94.0        | 89.0 – 90.5                      | 76.0 – 82.0        |
| 1A.3.3.2                     | 70.0 – 72.2                                                 | 36.0 – 46.0        | 68.5 – 71.9                             | 32.0 – 42.0        | 70.3 – 73.1                      | 36.0 – 44.0        |
| C<br>Virus isolates<br>clade | US H1 $\delta$ and related human seasonal reference viruses |                    |                                         |                    |                                  |                    |
|                              | swL10<br>(Clade 1B.2.2.2)                                   |                    | swAL16<br>(Clade 1B.2.2.1)              |                    | NC99, BR07<br>(Other human 1B.2) |                    |
|                              | HA1                                                         | Antigenic<br>sites | HA1                                     | Antigenic<br>sites | HA1                              | Antigenic<br>sites |
| 1C.2.1                       | 70.2 – 72.9                                                 | 42.0 – 48.0        | 69.6 – 72.4                             | 46.0 – 52.0        | 69.6 – 73.6                      | 40.0 – 48.0        |
| 1C.2.2                       | 69.0 – 70.9                                                 | 40.0 – 44.0        | 69.0 – 70.9                             | 44.0 – 48.0        | 69.3 – 72.1                      | 40.0 – 44.0        |
| 1B.1.2.1                     | 82.5 – 84.6                                                 | 58.0 – 70.0        | 80.4 – 82.5                             | 60.0 – 68.0        | 82.8 – 84.9                      | 58.0 – 70.0        |
| 1A.3.3.2                     | 70.6 – 72.4                                                 | 42.0 – 50.0        | 70.9 – 73.0                             | 42.0 – 50.0        | 70.6 – 72.7                      | 38.0 – 48.0        |
| D<br>Virus isolates<br>clade | H1pdm09 and US H1 $\gamma$ reference viruses                |                    |                                         |                    |                                  |                    |
|                              | CA09, SL15<br>(Clade 1A.3.3.2)                              |                    | swOH07<br>(Clade 1A.3.3.3)              |                    |                                  |                    |
|                              | HA1                                                         | Antigenic<br>sites | HA1                                     | Antigenic<br>sites |                                  |                    |
| 1C.2.1                       | 68.8 – 73.7                                                 | 56.0 – 72.0        | 71.9 – 74.6                             | 60.0 – 70.0        |                                  |                    |
| 1C.2.2                       | 71.6 – 74.3                                                 | 60.0 – 68.0        | 73.4 – 74.3                             | 64.0 – 66.0        |                                  |                    |
| 1B.1.2.1                     | 68.8 – 71.6                                                 | 32.0 – 44.0        | 70.3 – 71.6                             | 36.0 – 42.0        |                                  |                    |
| 1A.3.3.2                     | 88.7 – 97.2                                                 | 68.0 – 94.0        | 84.4 – 89.3                             | 66.0 – 80.0        |                                  |                    |

The reference viruses include the European avian-like H1 (EU H1av) (A), the European human-like H1 (EU H1hu) and related human H1 (other human 1B.1-like) (B), the United States H1 $\delta$  (US H1 $\delta$ ) and related human H1 (other human 1B.2) (C) and the 2009 pandemic H1 (H1pdm09) and US H1 $\gamma$  viruses (D). Full virus names: swFI82 -

A/swine/Finestère/2899/1982; swBE98 - A/swine/Belgium/1/1998; swG05 -  
A/swine/Gent/132/2005; swG10 - A/swine/Gent/28/2010; swSC94 -  
A/swine/Scotland/410440/1994; swG99 - A/swine/Gent/7625/1999; G02 -  
A/swine/Gent/177/2002; G12 - A/swine/Gent/26/2012; TW86 - A/Taiwan/1/1986; swIL10 -  
A/swine/Illinois/A0104020/2010; swAL16 - A/swine/Alabama/A01104091/2016; NC99 -  
A/New Caledonia/20/1999; BR07 - A/Brisbane/59/2007; CA09 - A/California/04/2009; SL15  
- A/Slovenia/2903/2015; OH07 - A/swine/Ohio/511445/2007
