# Supplementary material for: Genetic and antigenic evolution of H1 swine influenza A viruses isolated in Belgium and the Netherlands from 2014 through 2019
Source: PubMed Central journal article supplement (PMC8163766; doi:10.1038/s41598-021-90512-z), 2021-05-28
Supplement: 41598_2021_90512_MOESM2_ESM.pdf [file 41598_2021_90512_MOESM2_ESM.pdf]

|                                             |         | HI titer with hyperimmune swine or ferret* serum against: |         |        |        |         |        |        |        |         |      |           |         |         |          |       |       |
|---------------------------------------------|---------|-----------------------------------------------------------|---------|--------|--------|---------|--------|--------|--------|---------|------|-----------|---------|---------|----------|-------|-------|
|                                             |         | Eu H1av                                                   |         |        |        | Eu H1hu |        |        |        | H1pdm09 |      | US y/δ H1 |         |         | Human H1 |       |       |
|                                             |         | Sw F182                                                   | sw BE98 | sw G05 | Sw G10 | sw SC94 | Sw G99 | Sw G02 | sw G12 | CA09    | SL15 | sw OH07   | sw IL10 | Sw AL16 | TW86*    | NC99* | BR07* |
| Lineage                                     |         |                                                           |         |        |        |         |        |        |        |         |      |           |         |         |          |       |       |
| A/swine/Gent/5/2019 (swG5/19)               | Eu H1av | 640                                                       | 640     | 320    | 40     | <10     | 20     | <10    | <10    | 20      | <10  | <10       | <10     | <10     | <10      | <10   | <10   |
| A/swine/Gent/6/2019 (swG6/19)               | Eu H1av | 320                                                       | 640     | 320    | 40     | <10     | 40     | <10    | <10    | <10     | <10  | <10       | <10     | <10     | <10      | <10   | <10   |
| A/swine/Gent/9/2019 (swG9/19)               | Eu H1av | 320                                                       | 640     | 640    | 80     | <10     | 10     | <10    | <10    | 80      | 1280 | <10       | <10     | <10     | <10      | <10   | <10   |
| A/swine/Gent/29/2019 (swG29/19)             | Eu H1av | 320                                                       | 640     | 640    | 160    | <10     | 20     | <10    | <10    | 20      | <10  | 40        | <10     | <10     | <10      | <10   | <10   |
| A/swine/Gent/31/2019 (swG31/19)             | Eu H1av | 320                                                       | 320     | 640    | 80     | <10     | <10    | <10    | <10    | 40      | <10  | 10        | <10     | <10     | <10      | <10   | <10   |
| A/swine/Gent/54/2019 (swG54/19)             | Eu H1av | 160                                                       | 320     | 320    | 40     | <10     | <10    | <10    | <10    | 40      | <10  | <10       | <10     | <10     | <10      | <10   | <10   |
| A/swine/Gent/99/2019 (swG99/19)             | Eu H1av | 320                                                       | 640     | 640    | 80     | <10     | <10    | <10    | <10    | 40      | 10   | <10       | <10     | <10     | <10      | <10   | <10   |
| A/swine/Gent/124/2019 (swG124/19)           | Eu H1av | 160                                                       | 160     | 640    | 40     | <10     | <10    | <10    | <10    | 40      | <10  | <10       | <10     | <10     | <10      | <10   | <10   |
| A/swine/Gent/184/2019 (swG184/19)           | Eu H1av | 80                                                        | 320     | 320    | 80     | <10     | <10    | <10    | <10    | 20      | <10  | 10        | <10     | <10     | <10      | <10   | <10   |
| A/swine/Netherlands/Gent-193/19 (swG193/19) | Eu H1av | 40                                                        | 640     | 640    | 80     | <10     | 40     | <10    | <10    | 1280    | 320  | 10        | <10     | <10     | <10      | <10   | <10   |
| A/swine/Gent/202/19 (swG202/19)             | Eu H1av | 40                                                        | 640     | 320    | 80     | <10     | 10     | <10    | <10    | 20      | <10  | 20        | <10     | <10     | <10      | <10   | <10   |
| A/swine/Gent/203/19 (swG203/19)             | Eu H1av | 80                                                        | 1280    | 640    | 160    | <10     | 20     | <10    | <10    | 80      | 20   | 20        | <10     | <10     | <10      | <10   | <10   |
| A/swine/Gent/204/19 (swG204/19)             | Eu H1av | 40                                                        | 640     | 640    | 80     | <10     | 10     | <10    | <10    | 20      | <10  | 20        | <10     | <10     | <10      | <10   | <10   |
| A/swine/Gent/205/19 (swG205/19)             | Eu H1av | 20                                                        | 640     | 320    | 40     | <10     | 10     | <10    | <10    | 20      | <10  | <10       | <10     | <10     | <10      | <10   | <10   |
| A/swine/Gent/208/19 (swG208/19)             | Eu H1av | 40                                                        | 640     | 320    | 40     | <10     | <10    | <10    | <10    | 10      | <10  | <10       | <10     | <10     | <10      | <10   | <10   |
| A/swine/Gent/236/19 (swG236/19)             | Eu H1av | 410                                                       | 320     | 320    | 80     | <10     | <10    | <10    | <10    | 10      | <10  | <10       | <10     | <10     | <10      | <10   | <10   |
| A/swine/Gent/228/2014 (swG228/14)           | H1pdm09 | 20                                                        | <10     | <10    | <10    | <10     | 20     | <10    | <10    | 160     | 80   | <10       | 10      | <10     | <10      | <10   | <10   |
| A/swine/Gent/121/2018 (swG121/18)           | H1pdm09 | 640                                                       | 80      | 80     | 20     | 10      | 10     | <10    | <10    | 1280    | 5120 | 80        | <10     | <10     | <10      | <10   | <10   |
| A/swine/Gent/53/2019 (swG53/19)             | H1pdm09 | 320                                                       | 40      | 40     | 20     | <10     | 20     | <10    | <10    | 1280    | 1280 | 20        | <10     | <10     | <10      | <10   | <10   |
| A/swine/Gent/220/19 (swG220/19)             | H1pdm09 | <10                                                       | <10     | 20     | <10    | <10     | <10    | <10    | <10    | 1280    | 320  | <10       | <10     | <10     | <10      | <10   | <10   |
| A/swine/Gent/235/19 (swG235/19)             | H1pdm09 | <10                                                       | <10     | <10    | <10    | <10     | 10     | <10    | <10    | <10     | <10  | <10       | <10     | <10     | <10      | <10   | <10   |
| A/swine/Gent/30/2014 (swG30/14)             | Eu H1hu | <10                                                       | <10     | <10    | <10    | 320     | 2560   | 2560   | 640    | 10      | <10  | <10       | <10     | <10     | 40       | 10    | <10   |
| A/swine/Gent/35/2014 (swG35/14)             | Eu H1hu | <10                                                       | <10     | <10    | <10    | 160     | 2560   | 1280   | 640    | 10      | <10  | <10       | <10     | <10     | 40       | 10    | <10   |
| A/swine/Gent/93/2014 (swG93/14)             | Eu H1hu | <10                                                       | 20      | <10    | <10    | 640     | 5120   | 5120   | 2560   | 40      | <10  | <10       | <10     | <10     | 40       | 10    | <10   |

|                                                 |         | HI titer with hyperimmune swine or ferret* serum against: |         |        |        |         |        |        |        |         |      |           |         |         |          |       |       |
|-------------------------------------------------|---------|-----------------------------------------------------------|---------|--------|--------|---------|--------|--------|--------|---------|------|-----------|---------|---------|----------|-------|-------|
|                                                 |         | Eu H1av                                                   |         |        |        | Eu H1hu |        |        |        | H1pdm09 |      | US y/δ H1 |         |         | Human H1 |       |       |
|                                                 |         | Sw F182                                                   | sw BE98 | sw G05 | Sw G10 | sw SC94 | Sw G99 | Sw G02 | sw G12 | CA09    | SL15 | sw OH07   | sw IL10 | Sw AL16 | TW86*    | NC99* | BR07* |
| Lineage                                         |         |                                                           |         |        |        |         |        |        |        |         |      |           |         |         |          |       |       |
| A/swine/Gent/94/2014 (swG94/14)                 | Eu H1hu | 20                                                        | <10     | <10    | <10    | 80      | 2560   | 2560   | 1280   | 40      | 10   | <10       | 80      | <10     | 40       | 10    | <10   |
| A/swine/Gent/175/2014 (swG175/14)               | Eu H1hu | <10                                                       | 10      | <10    | <10    | 320     | 5120   | 5120   | 1280   | 20      | <10  | <10       | <10     | <10     | 80       | 20    | <10   |
| A/swine/Gent/36/2016 <sup>a</sup> (swG36/16)    | Eu H1hu | 10                                                        | 10      | <10    | <10    | 80      | 10240  | 2560   | 5120   | 80      | 10   | <10       | <10     | <10     | 320      | 40    | <10   |
| A/swine/Gent/5/2017 <sup>a</sup> (swG5/17)      | Eu H1hu | 10                                                        | 10      | <10    | <10    | 160     | 5120   | 5120   | 5120   | 80      | <10  | <10       | <10     | <10     | 640      | 80    | <10   |
| A/swine/Netherlands/Gent-7/2018 (swG7/18)       | Eu H1hu | <10                                                       | <10     | <10    | <10    | <10     | 640    | 80     | 160    | <10     | <10  | <10       | <10     | <10     | 10       | <10   | <10   |
| A/swine/Netherlands/Gent-9p18/2018 (swG9-18/18) | Eu H1hu | <10                                                       | 20      | <10    | <10    | 20      | 2560   | 1280   | 640    | <10     | <10  | <10       | <10     | 10      | 20       | 80    | <10   |
| A/swine/Gent/77/2018 (swG77/18)                 | Eu H1hu | 10                                                        | 40      | <10    | <10    | 2560    | 5120   | 2560   | 640    | <10     | <10  | <10       | <10     | <10     | 160      | 20    | <10   |
| A/swine/Gent/180/2018 (swG180/18)               | Eu H1hu | 10                                                        | 20      | <10    | <10    | 1280    | 5120   | 2560   | 1280   | 40      | <10  | <10       | <10     | <10     | 160      | 20    | <10   |
| A/swine/Netherlands/Gent-185/2018 (swG185/18)   | Eu H1hu | 10                                                        | 10      | <10    | <10    | 640     | 2560   | 1280   | 640    | 10      | <10  | <10       | <10     | <10     | 40       | 10    | <10   |
| A/swine/Gent/189/2018 (swG189/18)               | Eu H1hu | <10                                                       | 10      | <10    | <10    | 20      | 320    | 40     | 40     | <10     | <10  | <10       | <10     | <10     | <10      | <10   | <10   |
| A/swine/Gent/216/2018 (swG216/18)               | Eu H1hu | <10                                                       | 20      | <10    | <10    | 80      | 1280   | 320    | 320    | <10     | <10  | <10       | 10      | <10     | <10      | 40    | <10   |
| A/swine/Gent/233/2018 (swG233/18)               | Eu H1hu | <10                                                       | <10     | <10    | <10    | 40      | 640    | 640    | 320    | 40      | 10   | <10       | 40      | <10     | 10       | 10    | <10   |
| A/swine/Gent/28/2019 (swG28/19)                 | Eu H1hu | 20                                                        | <10     | <10    | <10    | 160     | 2560   | 1280   | 640    | 80      | 20   | <10       | 80      | <10     | 80       | 20    | <10   |
| A/swine/Gent/56/2019 (swG56/19)                 | Eu H1hu | <10                                                       | 20      | <10    | <10    | 320     | 2560   | 2560   | 1280   | 40      | <10  | <10       | <10     | <10     | 80       | 40    | <10   |
| A/swine/Gent/76/2019 (swG75/19)                 | Eu H1hu | <10                                                       | 10      | 10     | <10    | 80      | 2560   | 2560   | 1280   | 10      | <10  | <10       | <10     | <10     | 20       | 10    | <10   |
| A/swine/Gent/114/2019 (swG114/19)               | Eu H1hu | <10                                                       | 20      | <10    | <10    | 320     | 2560   | 2560   | 1280   | 10      | <10  | <10       | <10     | <10     | 320      | 20    | <10   |
| A/swine/Gent/119/2019 (swG119/19)               | Eu H1hu | <10                                                       | 20      | <10    | <10    | 320     | 5120   | 5120   | 2560   | 40      | <10  | <10       | <10     | <10     | 160      | 40    | <10   |
| A/swine/Gent/178/2019 (swG178/19)               | Eu H1hu | <10                                                       | 20      | <10    | <10    | 320     | 5120   | 2560   | 1280   | 40      | <10  | <10       | <10     | <10     | 160      | 40    | <10   |
| A/swine/Gent/180/2019 (swG180/19)               | Eu H1hu | <10                                                       | 20      | <10    | <10    | 320     | 5120   | 5120   | 1280   | 40      | <10  | <10       | <10     | <10     | 160      | 40    | <10   |
| A/swine/Gent/206/19 (swG206/19)                 | Eu H1hu | <10                                                       | <10     | <10    | <10    | 80      | 5120   | 2560   | 640    | 320     | 10   | <10       | 160     | <10     | 20       | 10    | <10   |
