# Supplementary material for: Genetic and antigenic evolution of H1 swine influenza A viruses isolated in Belgium and the Netherlands from 2014 through 2019
Source: PubMed Central journal article supplement (PMC8163766; doi:10.1038/s41598-021-90512-z), 2021-05-28
Supplement: 41598_2021_90512_MOESM3_ESM.pdf [file 41598_2021_90512_MOESM3_ESM.pdf]

**Genetic and antigenic evolution of H1 swine influenza A viruses isolated in Belgium and the Netherlands from 2014 through 2019**

**Sharon Chepkwony, Anna Parys, Elien Vandoorn, Wojciech Stadejek, Jiexiong Xie, Jacqueline King, Annika Graaf, Anne Pohlmann, Martin Beer, Timm Harder and Kristien Van Reeth**

**Supplementary Table S3.** Antigenic distances between the H1 isolates and the reference viruses

|                                                  |                                                       | Reference viruses |        |       |       |         |       |       |       |         |      |        |        |        |          |      |      |
|--------------------------------------------------|-------------------------------------------------------|-------------------|--------|-------|-------|---------|-------|-------|-------|---------|------|--------|--------|--------|----------|------|------|
|                                                  |                                                       | EU H1av           |        |       |       | EU H1hu |       |       |       | H1pdm09 |      | US H1γ | US H1δ |        | Human H1 |      |      |
|                                                  |                                                       | swFI82            | swBE98 | swG05 | swG10 | swSC94  | swG99 | swG02 | swG12 | CA09    | SL15 | swOH07 | swIL10 | swAL16 | TW86     | NC99 | BR07 |
| Reference viruses                                | A/swine/Finistere/2899/1982_H1N1_Clade_1C.1HA         |                   |        |       |       |         |       |       |       |         |      |        |        |        |          |      |      |
|                                                  | A/swine/Belgium/1/1998_H1N1_Clade_1C.2HA              | 3.9               |        |       |       |         |       |       |       |         |      |        |        |        |          |      |      |
|                                                  | A/swine/Gent/132/2005_H1N1_Clade_1C.2.1HA             | 4.5               | 5.2    |       |       |         |       |       |       |         |      |        |        |        |          |      |      |
|                                                  | A/swine/Gent/28/2010_H1N1_Clade_1C.2.1HA              | 1.7               | 4.5    | 3.1   |       |         |       |       |       |         |      |        |        |        |          |      |      |
|                                                  | A/swine/Scotland/410440/1994_H1N2_Clade_1B.1HA        | 8.2               | 7.7    | 10.2  | 8.5   |         |       |       |       |         |      |        |        |        |          |      |      |
|                                                  | A/swine/Gent/7625/1999_H1N2_Clade_1B.1.2.1HA          | 9.6               | 8.2    | 11.6  | 10.1  | 2.5     |       |       |       |         |      |        |        |        |          |      |      |
|                                                  | A/swine/Gent/177/2002_H1N2_Clade_1B.1.2.1HA           | 9.3               | 8.2    | 11.5  | 9.7   | 1.9     | 0.7   |       |       |         |      |        |        |        |          |      |      |
|                                                  | A/swine/Gent/26/2012_H1N2_Clade_1B.1.2.1HA            | 9.9               | 9.2    | 12.2  | 10.3  | 2.1     | 2.0   | 1.4   |       |         |      |        |        |        |          |      |      |
|                                                  | A/California/04/2009_H1N1_Clade_1A.3.3.2HA            | 3.3               | 5.7    | 5.6   | 3.0   | 6.2     | 8.2   | 7.8   | 8.0   |         |      |        |        |        |          |      |      |
|                                                  | A/Slovenia/2903/2015_H1N1_Clade_1A.3.3.2HA            | 3.5               | 6.0    | 5.9   | 3.3   | 6.3     | 8.3   | 7.8   | 8.0   | 0.4     |      |        |        |        |          |      |      |
|                                                  | A/swine/Ohio/511445/2007_H1N1_Clade_1A.3.3.3HA        | 2.8               | 5.9    | 6.5   | 3.4   | 7.1     | 8.9   | 8.4   | 8.6   | 2.1     | 1.9  |        |        |        |          |      |      |
|                                                  | A/swine/Illinois/A01047020/2010_H1N2_Clade_1B.2.2.2HA | 14.2              | 13.3   | 13.5  | 13.4  | 8.6     | 9.3   | 9.4   | 9.5   | 11.7    | 11.9 | 13.6   |        |        |          |      |      |
|                                                  | A/swine/Alabama/A01104091/2016_H1N2_Clade_1B.2.2.1HA  | 11.2              | 9.6    | 10.8  | 10.7  | 5.8     | 6.2   | 6.4   | 6.9   | 9.3     | 9.5  | 11.0   | 4.0    |        |          |      |      |
|                                                  | A/Taiwan/1/1986_H1N1_Clade_Other_human_1B.2HA         | 9.9               | 9.9    | 12.6  | 10.4  | 2.9     | 3.6   | 3.0   | 1.7   | 7.9     | 7.8  | 8.2    | 10.3   | 8.2    |          |      |      |
|                                                  | A/New_Caledonia/20/1999_H1N1_Clade_Other_human_1B.2HA | 13.6              | 11.6   | 13.2  | 13.2  | 7.5     | 7.2   | 7.5   | 8.1   | 11.8    | 12.0 | 13.4   | 4.3    | 2.7    | 9.5      |      |      |
| A/Brisbane/59/2007_H1N1_Clade_Other_human_1B.2HA | 14.8                                                  | 13.4              | 13.9   | 14.0  | 9.1   | 9.4     | 9.6   | 9.8   | 12.6  | 12.8    | 14.4 | 1.8    | 3.8    | 10.9   | 3.1      |      |      |
| Virus isolates                                   | A/swine/Netherlands/Gent_05/2014_H1N1_Clade_1C.2.1HA  | 6.3               | 3.4    | 4.8   | 6.1   | 9.7     | 10.1  | 10.2  | 11.3  | 7.8     | 8.2  | 8.6    | 13.1   | 9.6    | 12.3     | 11.4 | 13.0 |
|                                                  | A/swine/Gent/16/2014_H1N1_Clade_1C.2.1HA              | 5.8               | 2.6    | 4.9   | 5.8   | 9.4     | 9.7   | 9.8   | 11.0  | 7.5     | 7.9  | 8.1    | 13.4   | 9.8    | 11.9     | 11.6 | 13.3 |
|                                                  | A/swine/Gent/36/2014_H1N1_Clade_1C.2.1HA              | 5.5               | 2.8    | 4.2   | 5.4   | 9.8     | 10.3  | 10.3  | 11.4  | 7.3     | 7.7  | 7.9    | 13.7   | 10.2   | 12.3     | 12.1 | 13.6 |
|                                                  | A/swine/Netherlands/Gent_46/2014_H1N1_Clade_1C.2.1HA  | 5.7               | 2.7    | 4.7   | 5.7   | 9.6     | 10.0  | 10.1  | 11.2  | 7.5     | 7.9  | 8.1    | 13.6   | 10.1   | 12.1     | 11.8 | 13.5 |
|                                                  | A/swine/Netherlands/Gent_55/2014_H1N1_Clade_1C.2.1HA  | 4.3               | 4.5    | 2.5   | 3.0   | 7.9     | 9.4   | 9.2   | 10.0  | 4.1     | 4.5  | 5.6    | 11.2   | 8.5    | 10.4     | 10.9 | 11.7 |
|                                                  | A/swine/Gent/61/2014_H1N1_Clade_1C.2.1HA              | 4.5               | 4.3    | 2.3   | 3.3   | 8.2     | 9.6   | 9.4   | 10.2  | 4.7     | 5.1  | 6.1    | 11.3   | 8.5    | 10.8     | 10.9 | 11.7 |
|                                                  | A/swine/Gent/78/2014_H1N1_Clade_1C.2.1HA              | 4.6               | 3.1    | 2.7   | 4.0   | 9.0     | 9.9   | 9.9   | 10.9  | 5.9     | 6.3  | 6.9    | 12.7   | 9.5    | 11.6     | 11.6 | 12.8 |
|                                                  | A/swine/Gent/121/2014_H1N1_Clade_1C.2.1HA             | 5.5               | 2.7    | 4.2   | 5.3   | 9.2     | 9.7   | 9.8   | 10.9  | 7.0     | 7.4  | 7.8    | 13.0   | 9.5    | 11.8     | 11.4 | 12.9 |
|                                                  | A/swine/Gent/122/2014_H1N1_Clade_1C.2.1HA             | 5.5               | 2.7    | 4.2   | 5.3   | 9.2     | 9.7   | 9.8   | 10.9  | 7.0     | 7.4  | 7.8    | 13.0   | 9.5    | 11.8     | 11.4 | 12.9 |
|                                                  | A/swine/Gent/48/2015_H1N1_Clade_1C.2.1HA              | 5.8               | 3.0    | 4.4   | 5.6   | 9.7     | 10.2  | 10.3  | 11.4  | 7.5     | 7.9  | 8.2    | 13.4   | 10.0   | 12.3     | 11.8 | 13.4 |
|                                                  | A/swine/Netherlands/Gent_62/2015_H1N1_Clade_1C.2.1HA  | 5.9               | 2.8    | 4.7   | 5.8   | 9.6     | 10.0  | 10.1  | 11.2  | 7.6     | 8.0  | 8.2    | 13.5   | 9.9    | 12.1     | 11.7 | 13.4 |
|                                                  | A/swine/Gent/173/2015_H1N1_Clade_1C.2.1HA             | 5.9               | 2.6    | 5.0   | 5.9   | 9.3     | 9.6   | 9.7   | 10.9  | 7.5     | 7.9  | 8.1    | 13.4   | 9.8    | 11.8     | 11.5 | 13.2 |

|                                                         |      | Reference viruses |        |       |       |         |       |       |       |         |      |        |        |        |          |      |      |
|---------------------------------------------------------|------|-------------------|--------|-------|-------|---------|-------|-------|-------|---------|------|--------|--------|--------|----------|------|------|
|                                                         |      | EU H1av           |        |       |       | EU H1hu |       |       |       | H1pdm09 |      | US H1γ | US H1δ |        | Human H1 |      |      |
|                                                         |      | swFI82            | swBE98 | swG05 | swG10 | swSC94  | swG99 | swG02 | swG12 | CA09    | SL15 | swOH07 | swIL10 | swAL16 | TW86     | NC99 | BR07 |
| A/swine/Gent/150/2016_H1N1_Clade1C.2.1HA                | 5.6  | 2.9               | 4.1    | 5.3   | 9.4   | 9.9     | 10.0  | 11.1  | 7.1   | 7.5     | 7.9  | 13.1   | 9.6    | 12.0   | 11.5     | 13.0 |      |
| A/swine/Gent/13/2017_H1N1_Clade1C.2.1HA                 | 1.5  | 3.0               | 3.3    | 1.5   | 8.2   | 9.5     | 9.2   | 10.0  | 3.7   | 4.0     | 3.9  | 13.5   | 10.4   | 10.2   | 12.7     | 13.9 |      |
| A/swine/Gent/121/2017_H1avN2_Clade1C.2.1HA              | 4.6  | 4.2               | 3.9    | 3.7   | 6.6   | 8.0     | 7.9   | 8.6   | 3.9   | 4.3     | 5.5  | 10.2   | 7.2    | 9.2    | 9.7      | 10.6 |      |
| A/swine/Gent/138/2017_H1N1_Clade1C.2.1HA                | 5.5  | 2.8               | 4.6    | 5.1   | 7.5   | 8.2     | 8.2   | 9.3   | 6.1   | 6.5     | 7.2  | 11.3   | 7.8    | 10.2   | 9.7      | 11.3 |      |
| A/swine/Gent/180/2017_H1N1_Clade1C.2.1HA                | 4.9  | 3.3               | 3.9    | 4.3   | 7.1   | 8.1     | 8.1   | 9.1   | 5.0   | 5.5     | 6.4  | 10.7   | 7.5    | 9.8    | 9.7      | 10.9 |      |
| A/swine/Netherlands/Gent_8/2018_H1N1_Clade1C.2.1HA      | 1.2  | 3.8               | 3.4    | 0.8   | 8.3   | 9.8     | 9.5   | 10.1  | 3.3   | 3.6     | 3.4  | 13.7   | 10.7   | 10.3   | 13.1     | 14.2 |      |
| A/swine/Netherlands/Gent_9-p20/2018_H1N1_Clade_1C.2.1HA | 5.0  | 3.9               | 3.7    | 4.1   | 7.1   | 8.3     | 8.2   | 9.1   | 4.7   | 5.1     | 6.2  | 10.4   | 7.3    | 9.8    | 9.6      | 10.6 |      |
| A/swine/Gent/127/2018_H1N1_Clade_1C.2.1HA               | 2.9  | 3.4               | 1.9    | 2.2   | 9.1   | 10.4    | 10.2  | 11.0  | 4.7   | 5.1     | 5.3  | 13.5   | 10.5   | 11.4   | 12.8     | 13.9 |      |
| A/swine/Gent/196/2018_H1N1_Clade_1C.2.1HA               | 6.5  | 3.6               | 4.8    | 6.2   | 9.4   | 9.8     | 10.0  | 11.1  | 7.7   | 8.1     | 8.7  | 12.6   | 9.1    | 12.1   | 10.9     | 12.4 |      |
| A/swine/Gent/241/2018_H1N1_Clade_1C.2.1HA               | 6.0  | 2.8               | 5.4    | 6.2   | 10.2  | 10.4    | 10.5  | 11.7  | 8.1   | 8.5     | 8.4  | 14.6   | 11.0   | 12.5   | 12.7     | 14.5 |      |
| A/swine/Gent/243/2018_H1N1_Clade_1C.2.1HA               | 3.3  | 3.9               | 1.4    | 2.2   | 9.4   | 10.7    | 10.5  | 11.3  | 4.8   | 5.2     | 5.5  | 13.4   | 10.5   | 11.7   | 12.9     | 13.8 |      |
| A/swine/Gent/05/2019_H1N1_Clade_1C.2.1HA                | 6.0  | 2.2               | 5.8    | 6.2   | 8.7   | 8.8     | 8.9   | 10.1  | 7.5   | 7.9     | 8.0  | 13.2   | 9.4    | 11.1   | 11.1     | 13.0 |      |
| A/swine/Gent/06/2019_H1N1_Clade_1C.2.1HA                | 6.3  | 2.4               | 6.7    | 6.8   | 8.7   | 8.6     | 8.7   | 10.0  | 8.0   | 8.3     | 8.3  | 13.6   | 9.7    | 11.0   | 11.2     | 13.3 |      |
| A/swine/Gent/09/2019_H1N2_Clade_1C.2.1HA                | 3.3  | 3.9               | 1.7    | 2.1   | 8.6   | 10.0    | 9.8   | 10.5  | 4.2   | 4.6     | 5.2  | 12.5   | 9.7    | 10.9   | 12.1     | 13.0 |      |
| A/swine/Gent/31/2019_H1N1_Clade_1C.2.1HA                | 5.4  | 2.9               | 3.8    | 5.0   | 9.2   | 9.9     | 9.9   | 11.0  | 6.8   | 7.2     | 7.7  | 12.8   | 9.5    | 11.8   | 11.4     | 12.8 |      |
| A/swine/Gent/54/2019_H1N2_Clade_1C.2.1HA                | 6.3  | 3.6               | 4.3    | 5.8   | 9.3   | 9.9     | 10.0  | 11.1  | 7.4   | 7.8     | 8.4  | 12.4   | 9.0    | 12.1   | 10.9     | 12.1 |      |
| A/swine/Gent/99/2019_H1N1_Clade_1C.2.1HA                | 5.3  | 2.8               | 3.8    | 4.9   | 9.2   | 9.8     | 9.9   | 11.0  | 6.8   | 7.2     | 7.6  | 12.9   | 9.6    | 11.8   | 11.5     | 12.3 |      |
| A/swine/Gent/124/2019_H1N2_Clade_1C.2.1HA               | 6.2  | 3.8               | 3.9    | 5.5   | 9.4   | 10.0    | 10.1  | 11.2  | 7.2   | 7.6     | 8.2  | 12.2   | 9.0    | 12.1   | 10.9     | 12.9 |      |
| A/swine/Gent/205/2019_H1N1_Clade_1C.2.1HA               | 7.0  | 3.8               | 5.6    | 6.7   | 8.8   | 9.0     | 9.2   | 10.4  | 7.9   | 8.3     | 8.9  | 11.8   | 8.2    | 11.5   | 9.8      | 11.5 |      |
| A/swine/Gent/208/2019_H1N1_Clade_1C.2.1HA               | 6.8  | 3.6               | 5.3    | 6.6   | 9.6   | 9.9     | 10.1  | 11.2  | 8.1   | 8.5     | 9.0  | 12.9   | 9.4    | 12.3   | 11.0     | 12.7 |      |
| A/swine/Gent/236/2019_H1N1_Clade_1C.2.1HA               | 5.7  | 2.9               | 4.6    | 5.7   | 10.1  | 10.5    | 10.6  | 11.7  | 7.7   | 8.1     | 8.2  | 14.2   | 10.7   | 12.6   | 12.5     | 14.2 |      |
| A/swine/Netherlands/Gent_157/2017_H1N1_Clade1C.2.2HA    | 1.5  | 4.0               | 3.0    | 0.7   | 8.8   | 10.2    | 9.9   | 10.6  | 3.5   | 3.8     | 3.8  | 13.8   | 10.9   | 10.7   | 13.4     | 14.4 |      |
| A/swine/Netherlands/Gent_31/2018_H1N1_Clade1C.2.2HA     | 1.8  | 3.6               | 2.7    | 1.2   | 8.8   | 10.1    | 9.9   | 10.6  | 3.9   | 4.3     | 4.2  | 13.8   | 10.8   | 10.9   | 13.2     | 14.2 |      |
| A/swine/Netherlands/Gent_32/2018_H1N1_Clade1C.2.2HA     | 1.1  | 4.1               | 3.8    | 0.9   | 7.9   | 9.4     | 9.1   | 9.6   | 2.6   | 2.9     | 2.8  | 13.3   | 10.5   | 9.7    | 12.9     | 13.9 |      |
| A/swine/Netherlands/Gent_103/2018_H1N1-Clade_1C.2.2HA   | 2.1  | 4.1               | 2.4    | 0.9   | 8.9   | 10.4    | 10.1  | 10.8  | 3.8   | 4.1     | 4.3  | 13.6   | 10.8   | 11.0   | 13.2     | 14.2 |      |
| A/swine/Gent/29/2019_H1N1_Clade_1C.2.2HA                | 5.2  | 1.7               | 5.0    | 5.3   | 8.2   | 8.6     | 8.7   | 9.8   | 6.6   | 7.0     | 7.2  | 12.7   | 9.1    | 10.7   | 10.9     | 12.6 |      |
| A/swine/Gent/184/2019_H1N1_Clade_1C.2.2HA               | 6.2  | 3.3               | 4.5    | 5.8   | 9.3   | 9.8     | 9.9   | 11.0  | 7.4   | 7.6     | 8.3  | 12.6   | 9.2    | 12.0   | 11.0     | 12.2 |      |
| A/swine/Netherlands/Gent_193/2019_H1N1_1C.2.2HA         | 4.3  | 4.3               | 3.5    | 3.3   | 6.9   | 8.4     | 8.2   | 8.9   | 3.7   | 7.8     | 5.3  | 10.5   | 7.6    | 9.5    | 10.1     | 12.5 |      |
| A/swine/Gent/202/2019_H1N1_Clade_1C.2.2HA               | 6.3  | 2.9               | 5.3    | 6.1   | 8.4   | 8.7     | 8.9   | 10.1  | 7.3   | 4.1     | 8.2  | 12.1   | 8.5    | 11.1   | 10.2     | 10.9 |      |
| A/swine/Gent/203/2019_H1N1_Clade_1C.2.2HA               | 5.1  | 2.4               | 4.3    | 4.8   | 7.6   | 8.3     | 8.3   | 9.4   | 5.9   | 7.7     | 6.9  | 11.6   | 8.1    | 10.3   | 10.1     | 11.9 |      |
| A/swine/Gent/204/2019_H1N1_Clade_1C.2.2HA               | 6.1  | 2.9               | 5.0    | 5.8   | 8.5   | 8.9     | 9.0   | 10.1  | 7.1   | 6.3     | 8.0  | 12.1   | 8.5    | 11.1   | 10.3     | 11.6 |      |
| A/swine/Gent/30/2014_H1N2_Clade_1B.1.2.1HA              | 11.4 | 9.7               | 13.6   | 12.0  | 4.6   | 2.2     | 2.7   | 3.3   | 10.3  | 10.4    | 10.7 | 10.6   | 7.6    | 4.7    | 7.9      | 10.4 |      |
| A/swine/Gent/35/2014_H1N2_Clade_1B.1.2.1HA              | 11.6 | 9.7               | 13.5   | 12.1  | 4.7   | 2.3     | 2.9   | 3.6   | 10.4  | 10.5    | 10.9 | 10.3   | 7.2    | 5.1    | 7.4      | 10.0 |      |
| A/swine/Gent/93/2014_H1N2                               | 10.3 | 8.9               | 12.5   | 10.8  | 3.2   | 1.0     | 1.2   | 1.9   | 9.0   | 9.0     | 9.4  | 10.0   | 7.0    | 3.5    | 7.7      | 10.0 |      |
| A/swine/Gent/94/2014_H1N2_Clade_1B.1.2.1HA              | 10.2 | 9.7               | 12.1   | 10.3  | 2.0   | 2.9     | 2.4   | 1.5   | 7.9   | 7.9     | 8.7  | 8.2    | 6.1    | 2.2    | 7.4      | 8.7  |      |

|  |                                                          | Reference viruses |        |       |       |         |       |       |       |         |      |        |        |        |          |      |      |
|--|----------------------------------------------------------|-------------------|--------|-------|-------|---------|-------|-------|-------|---------|------|--------|--------|--------|----------|------|------|
|  |                                                          | EU H1av           |        |       |       | EU H1hu |       |       |       | H1pdm09 |      | US H1γ | US H1δ |        | Human H1 |      |      |
|  |                                                          | swFI82            | swBE98 | swG05 | swG10 | swSC94  | swG99 | swG02 | swG12 | CA09    | SL15 | swOH07 | swIL10 | swAL16 | TW86     | NC99 | BR07 |
|  | A/swine/Gent/175/2014_H1N2                               | 10.7              | 9.2    | 12.8  | 11.2  | 3.4     | 1.2   | 1.5   | 2.1   | 9.3     | 9.3  | 9.8    | 9.8    | 6.8    | 3.7      | 7.5  | 9.7  |
|  | A/swine/Gent/36/2016_H1N2_Clade_1B.1.2.1HA               | 9.9               | 9.0    | 12.1  | 10.2  | 2.0     | 1.6   | 1.1   | 0.4   | 8.0     | 8.0  | 8.6    | 9.2    | 6.5    | 2.1      | 11.5 | 9.5  |
|  | A/swine/Gent/5/2017_H1N2_Clade1B.1.2.1HA                 | 10.0              | 9.2    | 12.3  | 10.4  | 2.2     | 1.6   | 1.2   | 0.4   | 8.3     | 8.2  | 8.8    | 9.3    | 6.7    | 2.1      | 7.7  | 9.6  |
|  | A/swine/Netherlands/Gent_7/2018_H1N2_Clade1B.1.2.1HA     | 14.3              | 14.2   | 16.2  | 14.3  | 6.5     | 6.9   | 6.6   | 5.4   | 11.6    | 11.5 | 12.4   | 8.8    | 8.6    | 5.0      | 7.8  | 9.6  |
|  | A/swine/Netherlands/Gent_9-p18/2018_H1N2_Clade1B.1.2.1HA | 11.3              | 9.3    | 12.7  | 11.6  | 4.3     | 2.4   | 3.0   | 3.9   | 10.0    | 10.1 | 10.9   | 8.4    | 5.2    | 5.6      | 9.1  | 8.0  |
|  | A/swine/Gent/77/2018_H1N2_Clade_1B.1.2.1HA               | 9.8               | 8.4    | 12.4  | 10.5  | 3.8     | 1.9   | 2.0   | 2.7   | 8.9     | 8.9  | 9.0    | 11.3   | 8.1    | 3.9      | 5.4  | 11.3 |
|  | A/swine/Gent/180/2018_H1N2_Clade_1B.1.2.1HA              | 9.6               | 8.3    | 12.0  | 10.2  | 2.9     | 1.1   | 1.1   | 1.9   | 8.3     | 8.4  | 8.7    | 10.4   | 7.3    | 3.3      | 8.9  | 10.5 |
|  | A/swine/Netherlands/Gent_185/2018_H1N2_Clade_1B.1.2.1HA  | 10.5              | 8.6    | 12.7  | 11.2  | 4.4     | 2.0   | 2.5   | 3.4   | 9.6     | 9.7  | 10.0   | 11.0   | 7.7    | 4.9      | 8.2  | 10.8 |
|  | A/swine/Gent/189/2018_H1N2_1B.1.2.1HA                    | 12.0              | 8.9    | 13.0  | 12.5  | 7.6     | 5.5   | 6.2   | 7.4   | 11.8    | 12.0 | 12.4   | 11.4   | 7.7    | 6.1      | 8.2  | 10.5 |
|  | A/swine/Gent/216/2018_H1N2_Clade_1B.1.2.1                | 11.2              | 8.7    | 12.3  | 11.4  | 5.0     | 3.1   | 3.8   | 4.9   | 10.2    | 10.3 | 11.0   | 8.9    | 5.4    | 6.6      | 7.4  | 8.4  |
|  | A/swine/Gent/233/2018_H1N2_Clade_1B.1.2.1HA              | 11.4              | 11.3   | 13.1  | 11.3  | 3.8     | 5.0   | 4.5   | 3.5   | 8.7     | 8.6  | 9.6    | 7.6    | 6.6    | 3.3      | 5.5  | 8.4  |
|  | A/swine/Gent/28/2019_H1N2_Clade_1B.1.2.1HA               | 9.6               | 9.2    | 11.5  | 9.7   | 1.5     | 2.9   | 2.4   | 1.7   | 7.3     | 7.2  | 8.1    | 8.3    | 6.0    | 2.2      | 7.8  | 8.8  |
|  | A/swine/Gent/56/2019_H1N2_Clade_1B.1.2.1HA               | 10.2              | 8.6    | 12.1  | 10.6  | 3.0     | 0.6   | 1.3   | 2.3   | 8.8     | 8.9  | 9.5    | 9.3    | 6.2    | 4.0      | 7.5  | 9.3  |
|  | A/swine/Gent/76/2019_H1N2_Clade_1B.1.2.1HA               | 10.7              | 8.8    | 12.5  | 11.1  | 3.9     | 1.5   | 2.2   | 3.3   | 9.5     | 9.6  | 10.2   | 9.6    | 6.3    | 4.9      | 6.9  | 9.3  |
|  | A/swine/Gent/114/2019_H1N2_Clade_1B.1.2.1HA              | 10.4              | 8.9    | 12.7  | 11.0  | 3.6     | 1.3   | 1.7   | 2.4   | 9.2     | 9.3  | 9.6    | 10.4   | 7.3    | 3.8      | 6.7  | 10.4 |
|  | A/Swine/Gent/119/2019_H1N2_Clade_1B.1.2.1HA              | 10.2              | 9.0    | 12.3  | 10.6  | 2.6     | 0.9   | 0.9   | 1.4   | 8.7     | 8.7  | 9.2    | 9.4    | 6.5    | 3.1      | 7.4  | 9.5  |
|  | A/swine/Gent/178/2019_H1N2_Clade_1B.1.2.1HA              | 9.9               | 8.5    | 12.0  | 10.4  | 2.6     | 0.4   | 0.8   | 1.8   | 8.5     | 8.6  | 9.1    | 9.4    | 6.3    | 3.5      | 7.2  | 9.5  |
|  | A/swine/Gent/180/2019_H1N2_Clade_1B.1.2.1HA              | 10.1              | 8.7    | 12.2  | 10.5  | 2.7     | 0.6   | 0.8   | 1.7   | 8.6     | 8.7  | 9.2    | 9.5    | 6.5    | 3.4      | 7.3  | 9.5  |
|  | A/swine/Gent/206/2019_H1N2_Clade_1B.1.2.1HA              | 10.4              | 9.9    | 12.2  | 10.5  | 2.2     | 3.1   | 2.7   | 2.0   | 8.1     | 8.0  | 9.0    | 7.7    | 5.7    | 2.6      | 7.0  | 8.3  |
|  | A/Swine/Gent/228/2014_H1N2_Clade_1A.3.3.2HA              | 9.0               | 10.9   | 9.8   | 8.2   | 7.4     | 9.8   | 9.3   | 8.8   | 5.8     | 5.6  | 7.2    | 9.4    | 9.0    | 8.3      | 11.5 | 10.9 |
|  | A/swine/Gent/121/2018_H1N1_Clade_1A.3.3.2HA              | 3.2               | 6.0    | 5.2   | 2.6   | 7.1     | 9.1   | 8.7   | 8.9   | 0.9     | 1.0  | 2.2    | 12.3   | 9.9    | 8.7      | 12.5 | 13.1 |
|  | A/swine/Gent/53/2019_H1N1_Clade_1A.3.3.2HA               | 4.4               | 6.5    | 4.9   | 3.2   | 7.2     | 9.3   | 8.9   | 9.2   | 1.9     | 2.1  | 3.8    | 11.1   | 9.1    | 9.1      | 11.7 | 12.1 |
|  | A/swine/Gent/220/2019_H1N2_Clade_1A.3.3.2HA              | 7.5               | 9.4    | 6.9   | 6.2   | 10.0    | 10.7  | 10.3  | 10.3  | 4.8     | 4.9  | 6.6    | 9.9    | 9.0    | 10.1     | 11.6 | 11.1 |
|  | A/swine/Gent/235/2019_H1N2_Clade_1A.3.3.2HA              | 13.3              | 9.9    | 12.3  | 13.0  | 10.1    | 9.0   | 9.6   | 10.8  | 12.9    | 13.3 | 14.2   | 9.7    | 6.7    | 12.4     | 6.0  | 8.5  |
