# Supplementary material for: Genetic and antigenic evolution of H1 swine influenza A viruses isolated in Belgium and the Netherlands from 2014 through 2019
Source: PubMed Central journal article supplement (PMC8163766; doi:10.1038/s41598-021-90512-z), 2021-05-28
Supplement: 41598_2021_90512_MOESM4_ESM.pdf [file 41598_2021_90512_MOESM4_ESM.pdf]

## Genetic and antigenic evolution of H1 swine influenza A viruses isolated in Belgium and the Netherlands from 2014 through 2019

Sharon Chepkwony, Anna Parys, Elien Vandoorn, Wojciech Stadejek, Jiexiong Xie, Jacqueline King, Annika Graaf, Anne Pohlmann, Martin Beer, Timm Harder and Kristien Van Reeth

**Supplementary Table S5.** Percentage amino acid identities in the 50 antigenic sites between the virus isolates and the reference viruses

|                                                |                                                       | Reference viruses |        |       |       |         |       |       |       |             |        |          |      |      |         |      |        |
|------------------------------------------------|-------------------------------------------------------|-------------------|--------|-------|-------|---------|-------|-------|-------|-------------|--------|----------|------|------|---------|------|--------|
|                                                |                                                       | EU H1av           |        |       |       | EU H1hu |       |       |       | US H1 delta |        | Human H1 |      |      | H1pdm09 |      | US H1γ |
|                                                |                                                       | swFI82            | swBE98 | swG05 | swG10 | swSC94  | swG99 | swG02 | swG12 | swIL10      | swAL16 | TW86     | NC99 | BR07 | CA09    | SL15 | OH07   |
| Reference viruses                              | A/swine/Finistere/2899/1982_H1N1_Clade 1C.1HA         |                   |        |       |       |         |       |       |       |             |        |          |      |      |         |      |        |
|                                                | A/swine/Belgium/1/1998_H1N1_Clade 1C.2HA              | 88                |        |       |       |         |       |       |       |             |        |          |      |      |         |      |        |
|                                                | A/swine/Gent/132/2005_H1N1_Clade 1C.2.1HA             | 86                | 94     |       |       |         |       |       |       |             |        |          |      |      |         |      |        |
|                                                | A/swine/Gent/28/2010_H1N1_Clade 1C.2.1HA              | 82                | 90     | 96    |       |         |       |       |       |             |        |          |      |      |         |      |        |
|                                                | A/swine/Scotland/410440/1994_H1N2_Clade 1B.1HA        | 40                | 48     | 46    | 46    |         |       |       |       |             |        |          |      |      |         |      |        |
|                                                | A/swine/Gent/7625/1999_H1N2_Clade 1B.1.2.1HA          | 40                | 46     | 44    | 40    | 88      |       |       |       |             |        |          |      |      |         |      |        |
|                                                | A/swine/Gent/177/2002_H1N2_Clade 1B.1.2.1HA           | 36                | 42     | 40    | 40    | 92      | 96    |       |       |             |        |          |      |      |         |      |        |
|                                                | A/swine/Gent/26/2012_H1N2_Clade 1B.1.2.1HA            | 36                | 42     | 40    | 38    | 86      | 94    | 94    |       |             |        |          |      |      |         |      |        |
|                                                | A/swine/Illinois/A01047020/2010_H1N2_Clade 1B.2.2.2HA | 42                | 46     | 46    | 46    | 74      | 66    | 70    | 66    |             |        |          |      |      |         |      |        |
|                                                | A/swine/Alabama/A01104091/2016_H1N2_Clade 1B.2.2.1HA  | 44                | 50     | 50    | 48    | 70      | 66    | 66    | 66    | 90          |        |          |      |      |         |      |        |
|                                                | A/Taiwan/1/1986_H1N1_Clade Other human 1B.2HA         | 44                | 50     | 48    | 44    | 82      | 88    | 84    | 82    | 72          | 76     |          |      |      |         |      |        |
|                                                | A/New Caledonia/20/1999_H1N1_Clade Other human 1B.2HA | 42                | 48     | 46    | 46    | 76      | 72    | 76    | 70    | 84          | 84     | 82       |      |      |         |      |        |
|                                                | A/Brisbane/59/2007_H1N1_Clade Other human 1B.2HA      | 42                | 48     | 46    | 46    | 74      | 66    | 70    | 64    | 84          | 80     | 76       | 94   |      |         |      |        |
|                                                | A/California/04/2009_H1N1_Clade 1A.3.3.2HA            | 70                | 72     | 70    | 68    | 46      | 42    | 42    | 44    | 50          | 54     | 46       | 48   | 48   |         |      |        |
|                                                | A/Slovenia/2903/2015_H1N1_Clade 1A.3.3.2HA            | 66                | 66     | 64    | 62    | 40      | 36    | 36    | 38    | 44          | 48     | 40       | 42   | 42   | 92      |      |        |
| A/swine/Ohio/511445/2007_H1N1_Clade 1A.3.3.3HA | 64                                                    | 66                | 66     | 64    | 46    | 42      | 42    | 42    | 46    | 46          | 46     | 48       | 48   | 88   | 84      |      |        |
| Virus isolates                                 | A/swine/Netherlands/Gent_05/2014_H1N1_Clade 1C.2.1HA  | 80                | 86     | 90    | 90    | 46      | 42    | 40    | 40    | 42          | 46     | 46       | 42   | 42   | 64      | 58   | 60     |
|                                                | A/swine/Gent/16/2014_H1N1_Clade 1C.2.1HA              | 80                | 88     | 94    | 94    | 46      | 42    | 40    | 40    | 46          | 50     | 46       | 46   | 46   | 66      | 60   | 62     |
|                                                | A/swine/Gent/36/2014_H1N1_Clade 1C.2.1HA              | 76                | 82     | 88    | 88    | 42      | 38    | 36    | 36    | 42          | 46     | 42       | 42   | 42   | 62      | 58   | 60     |
|                                                | A/swine/Netherlands/Gent_46/2014_H1N1_Clade 1C.2.1HA  | 82                | 88     | 92    | 92    | 44      | 40    | 38    | 38    | 44          | 48     | 44       | 44   | 44   | 66      | 60   | 62     |
|                                                | A/swine/Netherlands/Gent_55/2014_H1N1_Clade 1C.2.1HA  | 74                | 82     | 88    | 88    | 44      | 40    | 38    | 38    | 44          | 48     | 44       | 42   | 42   | 62      | 58   | 60     |
|                                                | A/swine/Gent/61/2014_H1N1_Clade 1C.2.1HA              | 74                | 82     | 86    | 86    | 42      | 38    | 36    | 36    | 44          | 48     | 44       | 44   | 44   | 62      | 58   | 62     |
|                                                | A/swine/Gent/78/2014_H1N1_Clade 1C.2.1HA              | 80                | 88     | 92    | 92    | 46      | 42    | 40    | 40    | 48          | 50     | 48       | 48   | 48   | 66      | 60   | 64     |
|                                                | A/swine/Gent/121/2014_H1N1_Clade 1C.2.1HA             | 82                | 90     | 96    | 96    | 48      | 44    | 42    | 42    | 48          | 52     | 48       | 46   | 46   | 70      | 64   | 66     |
|                                                | A/swine/Gent/122/2014_H1N1_Clade 1C.2.1HA             | 82                | 90     | 96    | 96    | 48      | 44    | 42    | 42    | 48          | 52     | 48       | 46   | 46   | 70      | 64   | 66     |
|                                                | A/swine/Gent/48/2015_H1N1_Clade 1C.2.1HA              | 78                | 82     | 88    | 88    | 42      | 38    | 36    | 36    | 44          | 48     | 42       | 44   | 44   | 64      | 60   | 66     |
|                                                | A/swine/Netherlands/Gent_62/2015_H1N1_Clade 1C.2.1HA  | 78                | 86     | 92    | 92    | 44      | 40    | 38    | 40    | 48          | 50     | 46       | 46   | 46   | 66      | 60   | 62     |
|                                                | A/swine/Gent/173/2015_H1N1_Clade 1C.2.1HA             | 76                | 86     | 88    | 88    | 44      | 40    | 38    | 38    | 44          | 48     | 44       | 44   | 44   | 66      | 60   | 68     |
|                                                | A/swine/Gent/150/2016_H1N1_Clade 1C.2.1HA             | 80                | 88     | 94    | 94    | 48      | 44    | 42    | 42    | 48          | 52     | 48       | 46   | 46   | 68      | 62   | 64     |
| A/swine/Gent/13/2017_H1N1_Clade 1C.2.1HA       | 80                                                    | 88                | 94     | 94    | 46    | 42      | 40    | 40    | 46    | 50          | 46     | 44       | 44   | 72   | 66      | 68   |        |

|                                                          |    | Reference viruses |        |       |       |         |       |       |       |             |        |          |      |      |         |      |                |
|----------------------------------------------------------|----|-------------------|--------|-------|-------|---------|-------|-------|-------|-------------|--------|----------|------|------|---------|------|----------------|
|                                                          |    | EU H1av           |        |       |       | EU H1hu |       |       |       | US H1 delta |        | Human H1 |      |      | H1pdm09 |      | US H1 $\gamma$ |
|                                                          |    | swFI82            | swBE98 | swG05 | swG10 | swSC94  | swG99 | swG02 | swG12 | swIL10      | swAL16 | TW86     | NC99 | BR07 | CA09    | SL15 | OH07           |
| A/swine/Gent/121/2017_H1avN2_Clade1C.2.1HA               | 72 | 80                | 84     | 84    | 40    | 36      | 34    | 34    | 42    | 46          | 40     | 42       | 42   | 62   | 62      | 64   |                |
| A/swine/Gent/138/2017_H1N1_Clade1C.2.1HA                 | 78 | 84                | 86     | 86    | 44    | 40      | 38    | 38    | 48    | 50          | 44     | 46       | 46   | 64   | 58      | 64   |                |
| A/swine/Gent/180/2017_H1N1_Clade1C.2.1HA                 | 76 | 84                | 88     | 88    | 44    | 40      | 38    | 38    | 46    | 50          | 44     | 46       | 46   | 66   | 60      | 64   |                |
| A/swine/Netherlands/Gent_8/2018_H1N1_Clade1C.2.1HA       | 76 | 80                | 86     | 86    | 42    | 38      | 36    | 36    | 44    | 48          | 42     | 44       | 44   | 62   | 58      | 64   |                |
| A/swine/Netherlands/Gent_9-p20/2018_H1N1_Clade1C.2.1HA   | 70 | 78                | 82     | 82    | 40    | 38      | 36    | 36    | 42    | 46          | 44     | 42       | 42   | 62   | 58      | 60   |                |
| A/swine/Gent/127/2018_H1N1_Clade1C.2.1HA                 | 80 | 88                | 94     | 94    | 46    | 42      | 40    | 40    | 46    | 50          | 46     | 44       | 44   | 68   | 64      | 64   |                |
| A/swine/Gent/196/2018_H1N1_Clade1C.2.1HA                 | 74 | 82                | 88     | 88    | 44    | 42      | 40    | 40    | 44    | 48          | 48     | 42       | 42   | 62   | 58      | 60   |                |
| A/swine/Gent/241/2018_H1N1_Clade1C.2.1HA                 | 74 | 84                | 86     | 86    | 44    | 40      | 38    | 38    | 44    | 48          | 44     | 44       | 44   | 64   | 58      | 66   |                |
| A/swine/Gent/243/2018_H1N1_Clade1C.2.1HA                 | 76 | 84                | 90     | 90    | 44    | 40      | 38    | 38    | 46    | 50          | 44     | 44       | 44   | 70   | 68      | 70   |                |
| A/swine/Gent/05/2019_H1N1_Clade1C.2.1HA                  | 74 | 80                | 86     | 86    | 42    | 42      | 40    | 40    | 42    | 46          | 46     | 44       | 44   | 62   | 56      | 64   |                |
| A/swine/Gent/06/2019_H1N1_Clade1C.2.1HA                  | 76 | 82                | 88     | 88    | 44    | 44      | 42    | 42    | 44    | 48          | 48     | 46       | 46   | 64   | 58      | 66   |                |
| A/swine/Gent/09/2019_H1N2_Clade1C.2.1HA                  | 76 | 84                | 90     | 90    | 44    | 40      | 38    | 38    | 46    | 50          | 44     | 44       | 44   | 70   | 68      | 70   |                |
| A/swine/Gent/31/2019_H1N1_Clade1C.2.1HA                  | 76 | 84                | 90     | 90    | 44    | 40      | 38    | 38    | 46    | 50          | 44     | 44       | 44   | 70   | 68      | 70   |                |
| A/swine/Gent/54/2019_H1N2_Clade1C.2.1HA                  | 76 | 86                | 88     | 88    | 42    | 38      | 36    | 36    | 42    | 46          | 42     | 40       | 40   | 68   | 68      | 68   |                |
| A/swine/Gent/99/2019_H1N1_Clade1C.2.1HA                  | 76 | 84                | 90     | 90    | 42    | 38      | 36    | 36    | 42    | 46          | 42     | 40       | 40   | 68   | 68      | 68   |                |
| A/swine/Gent/124/2019_H1N2_Clade1C.2.1HA                 | 74 | 82                | 88     | 88    | 44    | 40      | 38    | 38    | 46    | 50          | 44     | 44       | 44   | 70   | 68      | 70   |                |
| A/swine/Gent/205/2019_H1N1_Clade1C.2.1HA                 | 74 | 82                | 88     | 88    | 44    | 40      | 38    | 38    | 44    | 48          | 42     | 42       | 42   | 68   | 66      | 68   |                |
| A/swine/Gent/208/2019_H1N1_Clade1C.2.1HA                 | 78 | 86                | 92     | 92    | 46    | 42      | 40    | 40    | 46    | 50          | 46     | 44       | 44   | 66   | 60      | 66   |                |
| A/swine/Gent/236/2019_H1N1_Clade1C.2.1HA                 | 80 | 88                | 94     | 94    | 48    | 44      | 42    | 42    | 48    | 52          | 48     | 46       | 46   | 68   | 62      | 64   |                |
| A/swine/Netherlands/Gent_157/2017_H1N1_Clade1C.2.2HA     | 82 | 90                | 96     | 96    | 44    | 40      | 38    | 38    | 44    | 48          | 44     | 44       | 44   | 68   | 64      | 66   |                |
| A/swine/Netherlands/Gent_31/2018_H1N1_Clade1C.2.2HA      | 80 | 88                | 94     | 94    | 44    | 40      | 38    | 38    | 42    | 46          | 42     | 42       | 42   | 66   | 62      | 64   |                |
| A/swine/Netherlands/Gent_32/2018_H1N1_Clade1C.2.2HA      | 80 | 88                | 94     | 94    | 44    | 40      | 38    | 38    | 44    | 48          | 44     | 44       | 44   | 68   | 64      | 66   |                |
| A/swine/Netherlands/Gent_103/2018_H1N1-Clade1C.2.2HA     | 82 | 90                | 96     | 96    | 44    | 40      | 38    | 38    | 44    | 48          | 44     | 44       | 44   | 68   | 64      | 66   |                |
| A/swine/Gent/29/2019_H1N1_Clade1C.2.2HA                  | 76 | 84                | 88     | 88    | 42    | 38      | 36    | 36    | 40    | 44          | 40     | 40       | 40   | 64   | 60      | 66   |                |
| A/swine/Gent/184/2019_H1N1_Clade1C.2.2HA                 | 76 | 84                | 88     | 88    | 42    | 38      | 36    | 36    | 40    | 44          | 40     | 40       | 40   | 64   | 60      | 66   |                |
| A/swine/Netherlands/Gent_193/2019_H1N1_1C.2.2HA          | 76 | 84                | 86     | 86    | 42    | 38      | 36    | 36    | 40    | 44          | 40     | 40       | 40   | 66   | 62      | 64   |                |
| A/swine/Gent/202/2019_H1N1_Clade1C.2.2HA                 | 76 | 84                | 88     | 88    | 42    | 38      | 36    | 36    | 40    | 44          | 40     | 40       | 40   | 64   | 60      | 66   |                |
| A/swine/Gent/203/2019_H1N1_Clade1C.2.2HA                 | 76 | 84                | 88     | 88    | 42    | 38      | 36    | 36    | 40    | 44          | 40     | 40       | 40   | 64   | 60      | 66   |                |
| A/swine/Gent/204/2019_H1N1_Clade1C.2.2HA                 | 76 | 84                | 88     | 88    | 42    | 38      | 36    | 36    | 40    | 44          | 40     | 40       | 40   | 64   | 60      | 66   |                |
| A/swine/Gent/30/2014_H1N2_Clade1B.1.2.1HA                | 36 | 42                | 40     | 38    | 84    | 90      | 90    | 92    | 66    | 66          | 82     | 68       | 64   | 44   | 38      | 42   |                |
| A/swine/Gent/35/2014_H1N2_Clade1B.1.2.1HA                | 36 | 42                | 40     | 38    | 86    | 92      | 92    | 94    | 68    | 68          | 82     | 70       | 66   | 44   | 38      | 42   |                |
| A/swine/Gent/94/2014_H1N2_Clade1B.1.2.1HA                | 38 | 40                | 40     | 38    | 86    | 92      | 92    | 94    | 70    | 68          | 82     | 70       | 64   | 44   | 38      | 42   |                |
| A/swine/Gent/36/2016_H1N2_Clade1B.1.2.1HA                | 36 | 42                | 40     | 38    | 78    | 86      | 84    | 82    | 62    | 64          | 80     | 68       | 62   | 40   | 34      | 38   |                |
| A/swine/Gent/5/2017_H1N2_Clade1B.1.2.1HA                 | 36 | 42                | 40     | 38    | 78    | 86      | 84    | 82    | 62    | 64          | 80     | 68       | 62   | 40   | 34      | 38   |                |
| A/swine/Netherlands/Gent_7/2018_H1N2_Clade1B.1.2.1HA     | 40 | 44                | 42     | 40    | 72    | 78      | 76    | 74    | 58    | 62          | 76     | 66       | 62   | 42   | 36      | 40   |                |
| A/swine/Netherlands/Gent_9-p18/2018_H1N2_Clade1B.1.2.1HA | 36 | 42                | 40     | 38    | 80    | 84      | 82    | 80    | 60    | 62          | 78     | 66       | 64   | 40   | 34      | 38   |                |
| A/swine/Gent/77/2018_H1N2_Clade1B.1.2.1HA                | 36 | 42                | 40     | 38    | 78    | 86      | 84    | 82    | 62    | 64          | 80     | 68       | 62   | 40   | 34      | 38   |                |
| A/swine/Gent/180/2018_H1N2_Clade1B.1.2.1HA               | 36 | 42                | 40     | 38    | 78    | 86      | 84    | 82    | 62    | 64          | 80     | 68       | 62   | 40   | 34      | 38   |                |

|  |                                                         | Reference viruses |        |       |       |         |       |       |       |             |        |          |      |      |         |      |                |
|--|---------------------------------------------------------|-------------------|--------|-------|-------|---------|-------|-------|-------|-------------|--------|----------|------|------|---------|------|----------------|
|  |                                                         | EU H1av           |        |       |       | EU H1hu |       |       |       | US H1 delta |        | Human H1 |      |      | H1pdm09 |      | US H1 $\gamma$ |
|  |                                                         | swFI82            | swBE98 | swG05 | swG10 | swSC94  | swG99 | swG02 | swG12 | swIL10      | swAL16 | TW86     | NC99 | BR07 | CA09    | SL15 | OH07           |
|  | A/swine/Netherlands/Gent_185/2018_H1N2_Clade 1B.1.2.1HA | 36                | 42     | 40    | 38    | 76      | 84    | 82    | 80    | 60          | 62     | 78       | 66   | 60   | 40      | 34   | 38             |
|  | A/swine/Gent/189/2018_H1N2_Clade 1B.1.2.1HA             | 36                | 42     | 40    | 38    | 74      | 82    | 80    | 78    | 62          | 64     | 76       | 64   | 60   | 40      | 34   | 38             |
|  | A/swine/Gent/216/2018_H1N2_Clade 1B.1.2.1               | 36                | 42     | 40    | 38    | 78      | 86    | 84    | 82    | 62          | 64     | 80       | 68   | 62   | 40      | 34   | 38             |
|  | A/swine/Gent/233/2018_H1N2_Clade 1B.1.2.1HA             | 40                | 42     | 42    | 40    | 76      | 84    | 82    | 80    | 64          | 66     | 78       | 66   | 60   | 42      | 36   | 38             |
|  | A/swine/Gent/28/2019_H1N2_Clade 1B.1.2.1HA              | 38                | 40     | 40    | 38    | 74      | 82    | 80    | 78    | 62          | 64     | 76       | 64   | 58   | 40      | 34   | 36             |
|  | A/swine/Gent/56/2019_H1N2_Clade 1B.1.2.1HA              | 36                | 42     | 40    | 38    | 76      | 84    | 82    | 80    | 64          | 66     | 78       | 70   | 64   | 40      | 34   | 38             |
|  | A/swine/Gent/76/2019_H1N2_Clade 1B.1.2.1HA              | 38                | 40     | 38    | 36    | 74      | 82    | 80    | 78    | 58          | 60     | 76       | 64   | 58   | 38      | 32   | 36             |
|  | A/swine/Gent/114/2019_H1N2_Clade 1B.1.2.1HA             | 36                | 42     | 40    | 38    | 78      | 86    | 84    | 82    | 62          | 64     | 80       | 68   | 62   | 40      | 34   | 38             |
|  | A/Swine/Gent/119/2019_H1N2_Clade 1B.1.2.1HA             | 36                | 42     | 40    | 38    | 78      | 86    | 84    | 82    | 62          | 64     | 80       | 68   | 62   | 40      | 34   | 38             |
|  | A/swine/Gent/178/2019_H1N2_Clade 1B.1.2.1HA             | 34                | 40     | 38    | 36    | 76      | 84    | 82    | 80    | 60          | 62     | 78       | 66   | 60   | 38      | 32   | 36             |
|  | A/swine/Gent/180/2019_H1N2_Clade 1B.1.2.1HA             | 34                | 40     | 38    | 36    | 76      | 84    | 82    | 80    | 60          | 62     | 78       | 66   | 60   | 38      | 32   | 36             |
|  | A/swine/Gent/206/2019_H1N2_Clade 1B.1.2.1HA             | 38                | 40     | 40    | 38    | 74      | 82    | 80    | 78    | 66          | 62     | 76       | 64   | 62   | 40      | 34   | 38             |
|  | A/Swine/Gent/228/2014_H1N2_Clade 1A.3.3.2HA             | 66                | 68     | 64    | 64    | 46      | 40    | 42    | 42    | 50          | 50     | 44       | 48   | 46   | 88      | 86   | 78             |
|  | A/swine/Gent/121/2018_H1N1_Clade 1A.3.3.2HA             | 64                | 64     | 62    | 60    | 36      | 32    | 32    | 34    | 40          | 44     | 36       | 38   | 38   | 84      | 92   | 76             |
|  | A/swine/Gent/53/2019_H1N1_Clade 1A.3.3.2HA              | 62                | 64     | 62    | 60    | 40      | 36    | 36    | 38    | 44          | 48     | 40       | 42   | 42   | 88      | 94   | 80             |
|  | A/swine/Gent/220/2019_H1N2_Clade 1A.3.3.2HA             | 62                | 66     | 64    | 64    | 44      | 38    | 40    | 40    | 44          | 46     | 40       | 44   | 42   | 84      | 82   | 72             |
|  | A/swine/Gent/235/2019_H1N2_Clade 1A.3.3.2HA             | 52                | 58     | 54    | 54    | 42      | 36    | 38    | 34    | 42          | 42     | 38       | 46   | 46   | 68      | 72   | 66             |
