# Supplementary material for: Genetic and antigenic evolution of H1 swine influenza A viruses isolated in Belgium and the Netherlands from 2014 through 2019
Source: PubMed Central journal article supplement (PMC8163766; doi:10.1038/s41598-021-90512-z), 2021-05-28
Supplement: 41598_2021_90512_MOESM5_ESM.pdf [file 41598_2021_90512_MOESM5_ESM.pdf]

## Genetic and antigenic evolution of H1 swine influenza A viruses isolated in Belgium and the Netherlands from 2014 through 2019

Sharon Chepkwony, Anna Parys, Elien Vandoorn, Wojciech Stadejek, Jiexiong Xie, Jacqueline King, Annika Graaf, Anne Pohlmann, Martin Beer, Timm Harder and Kristien Van Reeth

**Supplementary Table S6:** Neuramidase inhibition (NI) antibody titers against reference viruses used in preliminary subtyping.

| Virus isolate         | NI antibody titers against: |                  |              |               | Isolate subtype |
|-----------------------|-----------------------------|------------------|--------------|---------------|-----------------|
|                       | swBE98 (H1avN1)             | CA09 (H1pdm09N1) | swG99 (H1N2) | swFL98 (H3N2) |                 |
| A/swine/Gent/34/2014  | <160                        | <160             | <160         | 640           | H3N2            |
| A/swine/Gent/175/2014 | <160                        | 320              | 20480        | 640           | H1N2            |

Full virus names: swBE98 - A/swine/Belgium/1/1998; CA09 - A/California/04/2009; swG99 - A/swine/Gent/7625/1999; swFL98 - A/swine/Flanders/1/1998
